# Supplementary material for: A ring-distortion strategy to construct stereochemically complex and structurally diverse compounds from natural products
Source: Springer Nature journal article supplement (doi:10.1038/nchem.1549), 2013-01-18
Supplement: 41557_2013_BFnchem1549_MOESM159_ESM.mol [file 41557_2013_BFnchem1549_MOESM159_ESM.mol]

  ChemDraw12211205522D

 27 31  0  0  0  0  0  0  0  0999 V2000
   -2.0936    0.7205    0.0000 C   0  0  0  0  0  0  0  0  0  0  0  0
   -2.0936   -0.1045    0.0000 C   0  0  0  0  0  0  0  0  0  0  0  0
   -1.3791   -0.5170    0.0000 C   0  0  0  0  0  0  0  0  0  0  0  0
   -0.6646   -0.1045    0.0000 C   0  0  0  0  0  0  0  0  0  0  0  0
   -0.6646    0.7205    0.0000 C   0  0  0  0  0  0  0  0  0  0  0  0
   -1.3791    1.1330    0.0000 C   0  0  0  0  0  0  0  0  0  0  0  0
    0.1200   -0.3594    0.0000 C   0  0  0  0  0  0  0  0  0  0  0  0
    0.6049    0.3080    0.0000 C   0  0  0  0  0  0  0  0  0  0  0  0
    0.1200    0.9755    0.0000 C   0  0  0  0  0  0  0  0  0  0  0  0
    1.4254    0.3943    0.0000 C   0  0  0  0  0  0  0  0  0  0  0  0
    1.7609    1.1480    0.0000 C   0  0  0  0  0  0  0  0  0  0  0  0
    1.2760    1.8154    0.0000 C   0  0  0  0  0  0  0  0  0  0  0  0
    0.4555    1.7292    0.0000 C   0  0  0  0  0  0  0  0  0  0  0  0
   -0.5787   -0.9221    0.0000 H   0  0  0  0  0  0  0  0  0  0  0  0
   -0.4301    1.5864    0.0000 H   0  0  0  0  0  0  0  0  0  0  0  0
    1.0160   -0.4039    0.0000 C   0  0  0  0  0  0  0  0  0  0  0  0
    2.1734    0.4335    0.0000 C   0  0  0  0  0  0  0  0  0  0  0  0
    2.4504    1.5957    0.0000 O   0  0  0  0  0  0  0  0  0  0  0  0
    2.9774    0.2617    0.0000 C   0  0  0  0  0  0  0  0  0  0  0  0
   -2.8510    0.2221    0.0000 O   0  0  0  0  0  0  0  0  0  0  0  0
   -2.1365   -1.0154    0.0000 C   0  0  0  0  0  0  0  0  0  0  0  0
   -2.9774   -0.6444    0.0000 O   0  0  0  0  0  0  0  0  0  0  0  0
   -2.3260   -1.8154    0.0000 O   0  0  0  0  0  0  0  0  0  0  0  0
   -0.9680   -1.2290    0.0000 C   0  0  0  0  0  0  0  0  0  0  0  0
    0.3740   -1.1413    0.0000 C   0  0  0  0  0  0  0  0  0  0  0  0
   -0.1761   -1.7523    0.0000 O   0  0  0  0  0  0  0  0  0  0  0  0
    1.1783   -1.3122    0.0000 O   0  0  0  0  0  0  0  0  0  0  0  0
  2  3  1  0      
  3  4  1  0      
  4  5  1  0      
  6  1  1  0      
  4  7  1  0      
  7  8  1  0      
  8  9  1  0      
  9  5  1  0      
  8 10  1  0      
 10 11  1  0      
 11 12  1  0      
 12 13  1  0      
 13  9  1  0      
  6  5  2  0      
  3 24  1  0      
  4 14  1  1      
  7 25  1  1      
  9 15  1  1      
  8 16  1  1      
 11 17  1  1      
 16 17  1  1      
 11 18  1  0      
 17 19  2  0      
  2  1  1  0      
  1 20  1  6      
  3 21  1  6      
 21 20  1  0      
  2 22  1  1      
 21 23  2  0      
 25 26  2  0      
 25 27  1  0      
M  END
