# Supplementary material for: A ring-distortion strategy to construct stereochemically complex and structurally diverse compounds from natural products
Source: Springer Nature journal article supplement (doi:10.1038/nchem.1549), 2013-01-18
Supplement: 41557_2013_BFnchem1549_MOESM175_ESM.mol [file 41557_2013_BFnchem1549_MOESM175_ESM.mol]

  ChemDraw12211205522D

 22 25  0  0  0  0  0  0  0  0999 V2000
   -2.5356    0.6891    0.0000 C   0  0  0  0  0  0  0  0  0  0  0  0
   -2.5356   -0.1359    0.0000 C   0  0  0  0  0  0  0  0  0  0  0  0
   -1.8211   -0.5484    0.0000 C   0  0  0  0  0  0  0  0  0  0  0  0
   -1.1066   -0.1359    0.0000 C   0  0  0  0  0  0  0  0  0  0  0  0
   -1.1066    0.6891    0.0000 C   0  0  0  0  0  0  0  0  0  0  0  0
   -1.8211    1.1016    0.0000 C   0  0  0  0  0  0  0  0  0  0  0  0
   -0.3220   -0.3909    0.0000 C   0  0  0  0  0  0  0  0  0  0  0  0
    0.1629    0.2766    0.0000 C   0  0  0  0  0  0  0  0  0  0  0  0
   -0.3220    0.9440    0.0000 C   0  0  0  0  0  0  0  0  0  0  0  0
    0.9834    0.3628    0.0000 C   0  0  0  0  0  0  0  0  0  0  0  0
    1.3190    1.1165    0.0000 C   0  0  0  0  0  0  0  0  0  0  0  0
    0.8340    1.7839    0.0000 C   0  0  0  0  0  0  0  0  0  0  0  0
    0.0136    1.6977    0.0000 C   0  0  0  0  0  0  0  0  0  0  0  0
    0.5740   -0.4354    0.0000 C   0  0  0  0  0  0  0  0  0  0  0  0
    1.7315    0.4020    0.0000 C   0  0  0  0  0  0  0  0  0  0  0  0
    2.5356    0.2302    0.0000 O   0  0  0  0  0  0  0  0  0  0  0  0
   -0.8721    1.5550    0.0000 H   0  0  0  0  0  0  0  0  0  0  0  0
   -0.0679   -1.1729    0.0000 C   0  0  0  0  0  0  0  0  0  0  0  0
   -0.6181   -1.7839    0.0000 O   0  0  0  0  0  0  0  0  0  0  0  0
    0.7363   -1.3438    0.0000 O   0  0  0  0  0  0  0  0  0  0  0  0
    2.0310    1.5276    0.0000 C   0  0  0  0  0  0  0  0  0  0  0  0
   -1.8211   -1.3707    0.0000 C   0  0  0  0  0  0  0  0  0  0  0  0
  2  3  2  0      
  3  4  1  0      
  4  5  2  0      
  6  1  2  0      
  4  7  1  0      
  7  8  1  0      
  8  9  1  0      
  9  5  1  0      
  8 10  1  0      
 10 11  1  0      
 11 12  1  0      
 12 13  1  0      
 13  9  1  0      
  2  1  1  0      
  6  5  1  0      
  7 18  1  1      
  8 14  1  6      
 11 15  1  6      
 14 15  1  0      
 11 21  1  0      
 15 16  2  0      
  3 22  1  0      
  9 17  1  1      
 18 19  2  0      
 18 20  1  0      
M  END
